# Supplementary material
Source: publisher figshare collection journal article supplement (https://sage.figshare.com/ndownloader/files/17855393)
Supplement: Supplementary file 1 [file 17855393]

## **Supplemental material 2**

### **Open-ended questionnaire post-observation phase:**

What is your first reaction after the video recordings of your consultations?

Practical organization:

What went well?

What could be organised better?

Were you aware of the camera? When? Why?

Did the camera influence your way of consulting? In what way?

Are there any elements you would like to discuss with the researchers?

If you could choose a consultation to discuss with one of the researchers, which one would you choose? Why?

How did patients react?

Is there anything else you want to share?

### **Reflection during elicitation interview:**

How was it for you being video recorded?

Questions of the open-ended questionnaire (see above) were deepened during the interview.
